# Supplementary material for: An example of the utility of genomic analysis for fast and accurate clinical diagnosis of complex rare phenotypes
Source: PubMed Central journal article supplement (PMC5297239; doi:10.1186/s13023-017-0582-8), 2017-02-07

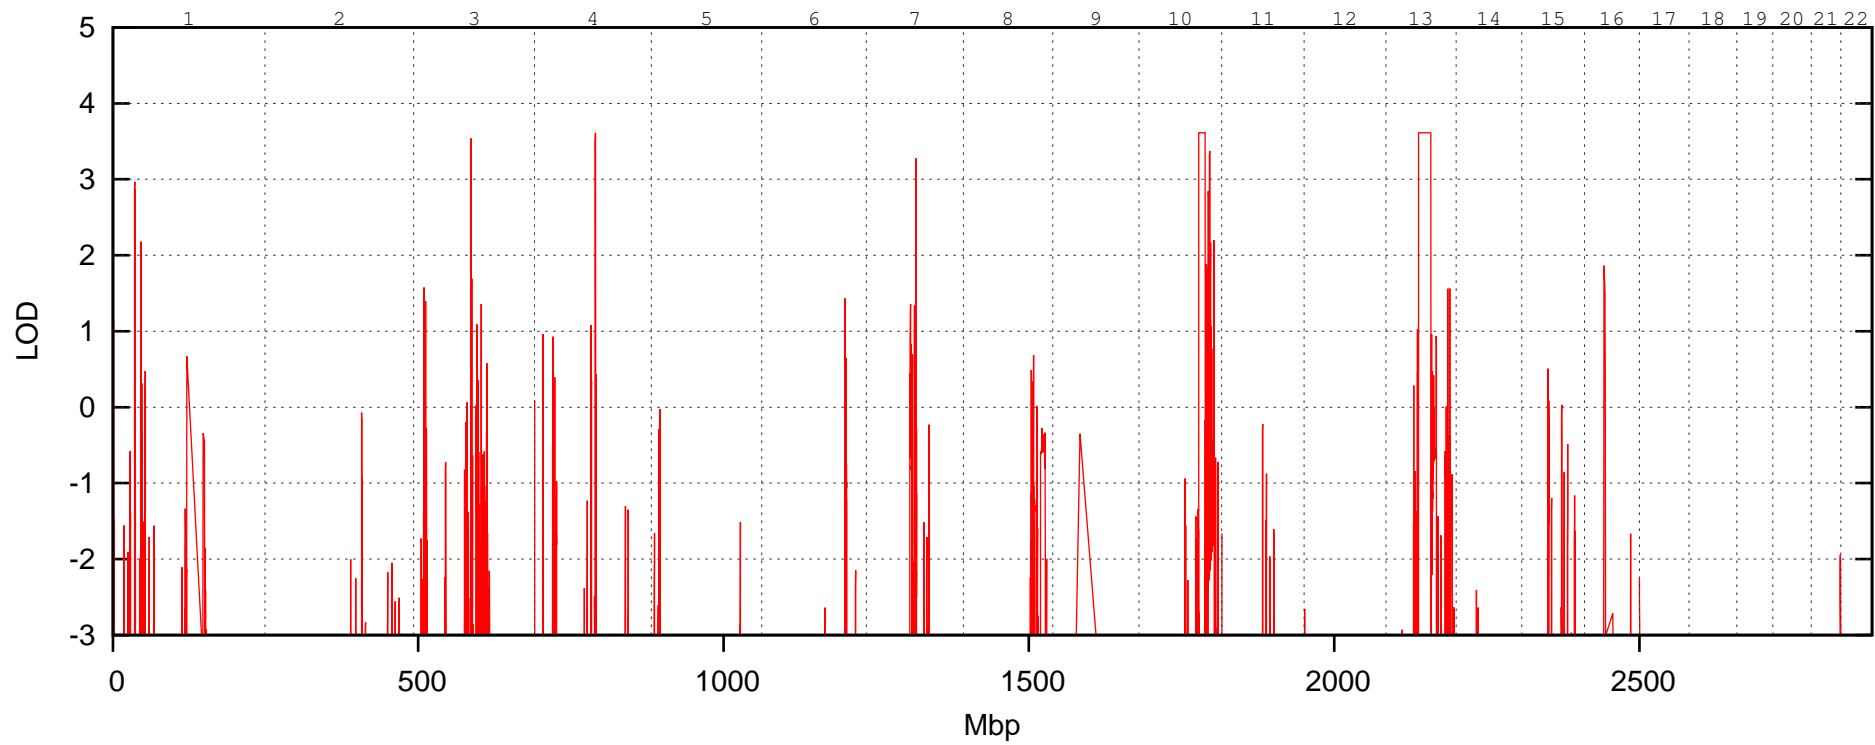

Supplement: 13023_2017_582_MOESM3_ESM.pdf [file 13023_2017_582_MOESM3_ESM.pdf]
