# Supplementary material for: An example of the utility of genomic analysis for fast and accurate clinical diagnosis of complex rare phenotypes
Source: PubMed Central journal article supplement (PMC5297239; doi:10.1186/s13023-017-0582-8), 2017-02-07

a.

### Mother –genomic DNA BAM reads for rs148746572 (exon 6)

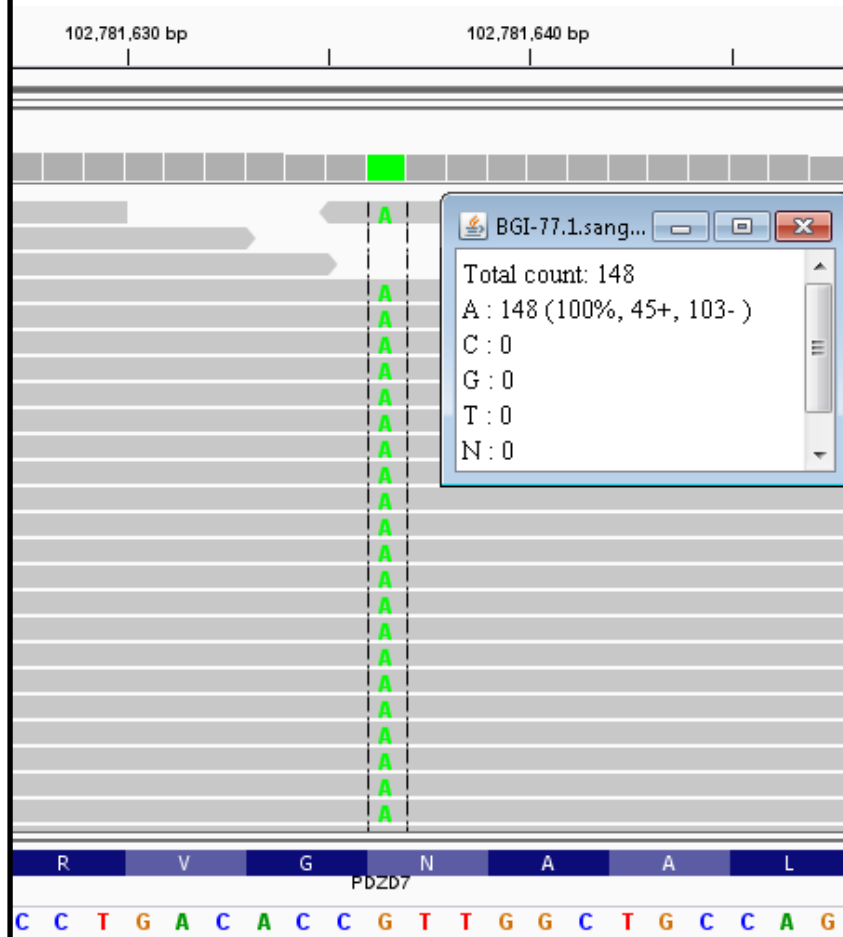

### Father – genomic DNA BAM reads for rs148746572 (exon 6); inset: cDNA Sanger sequence

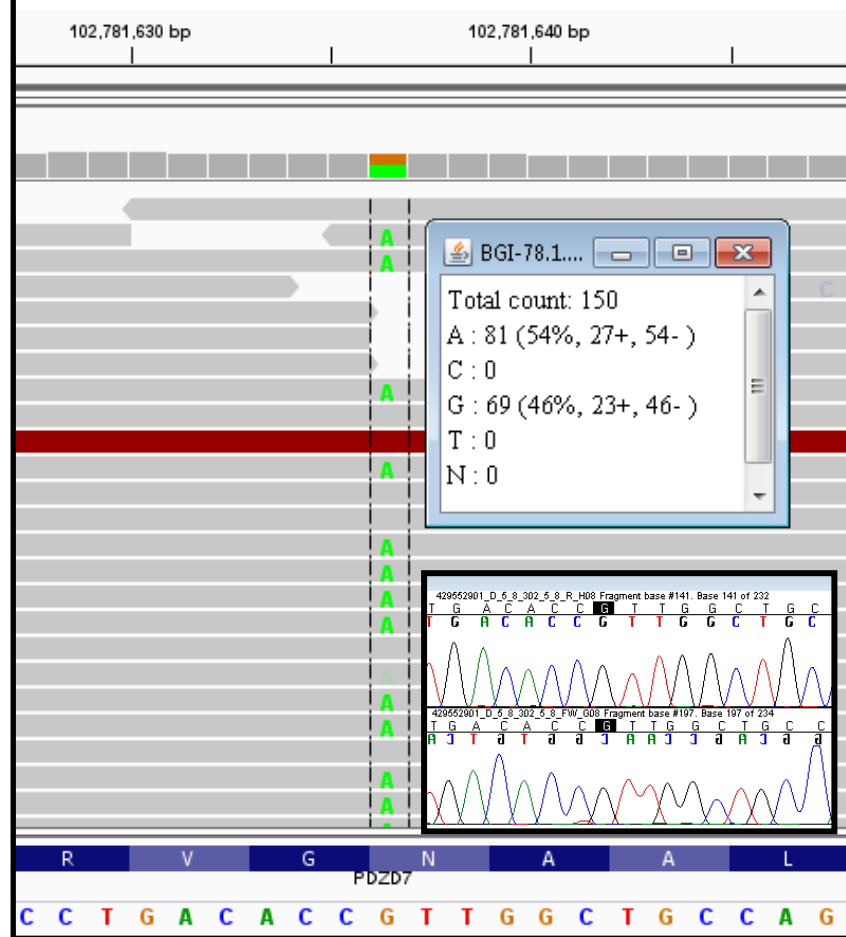

b.

### Mother –genomic DNA BAM reads for rs547610251 (exon 15)

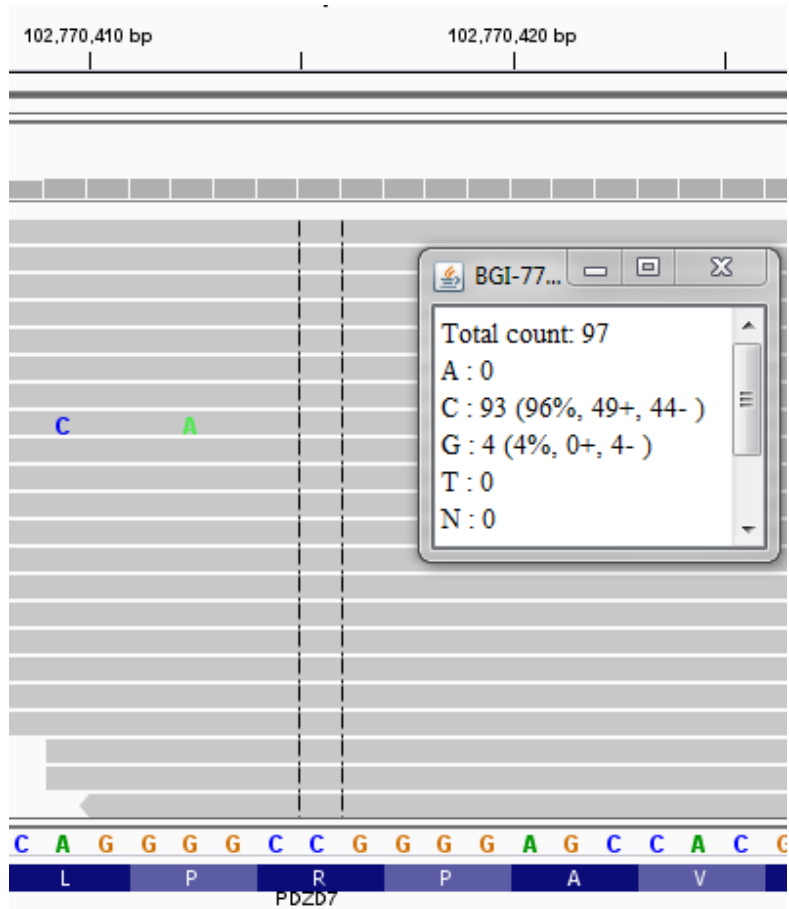

### Father – genomic DNA BAM reads for rs547610251 (exon 15); inset: cDNA Sanger sequence

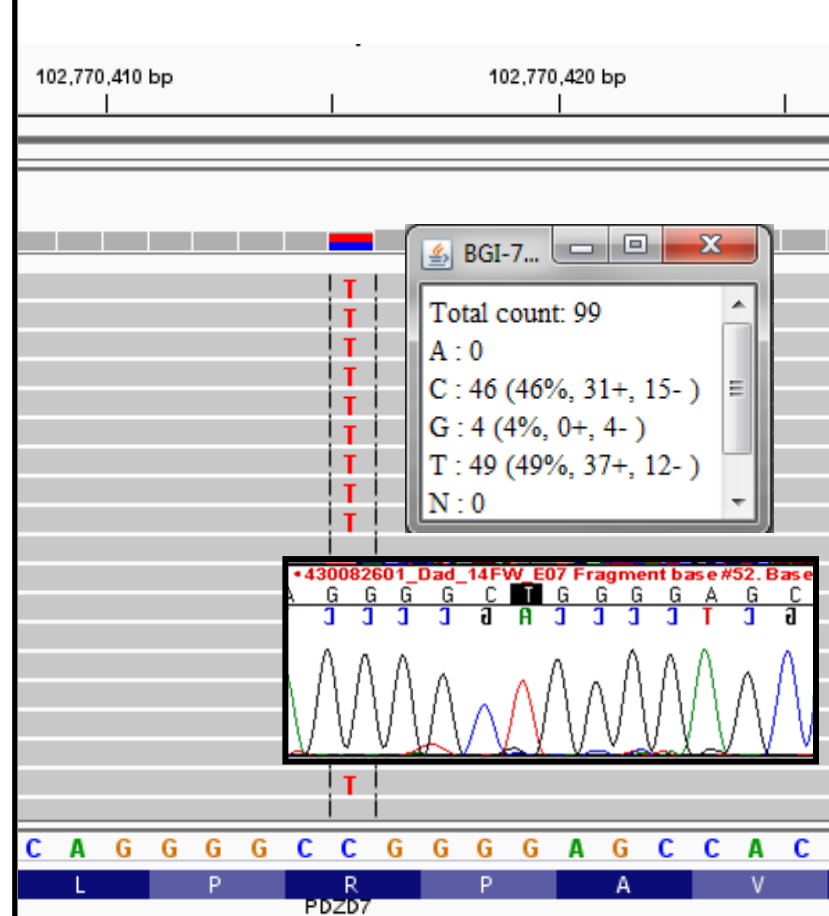

Supplement: 13023_2017_582_MOESM7_ESM.pdf [file 13023_2017_582_MOESM7_ESM.pdf]
